# Supplementary material for: Oral administration of an HSP90 inhibitor, 17-DMAG, intervenes tumor-cell infiltration into multiple organs and improves survival period for ATL model mice
Source: PubMed Central journal article supplement — Blood Cancer J. 2013 Aug 16;3(8):e132–. doi: 10.1038/bcj.2013.30 (PMC3763384; doi:10.1038/bcj.2013.30), 2013-08-16
Supplement: bcj201330x1.pdf [file bcj201330x1.pdf]

**Supplement 1. Tax degradation and I- $\kappa$ B $\alpha$  stabilization by 17-DMAG but not by Dexamethasone treatment to ATL cells.**

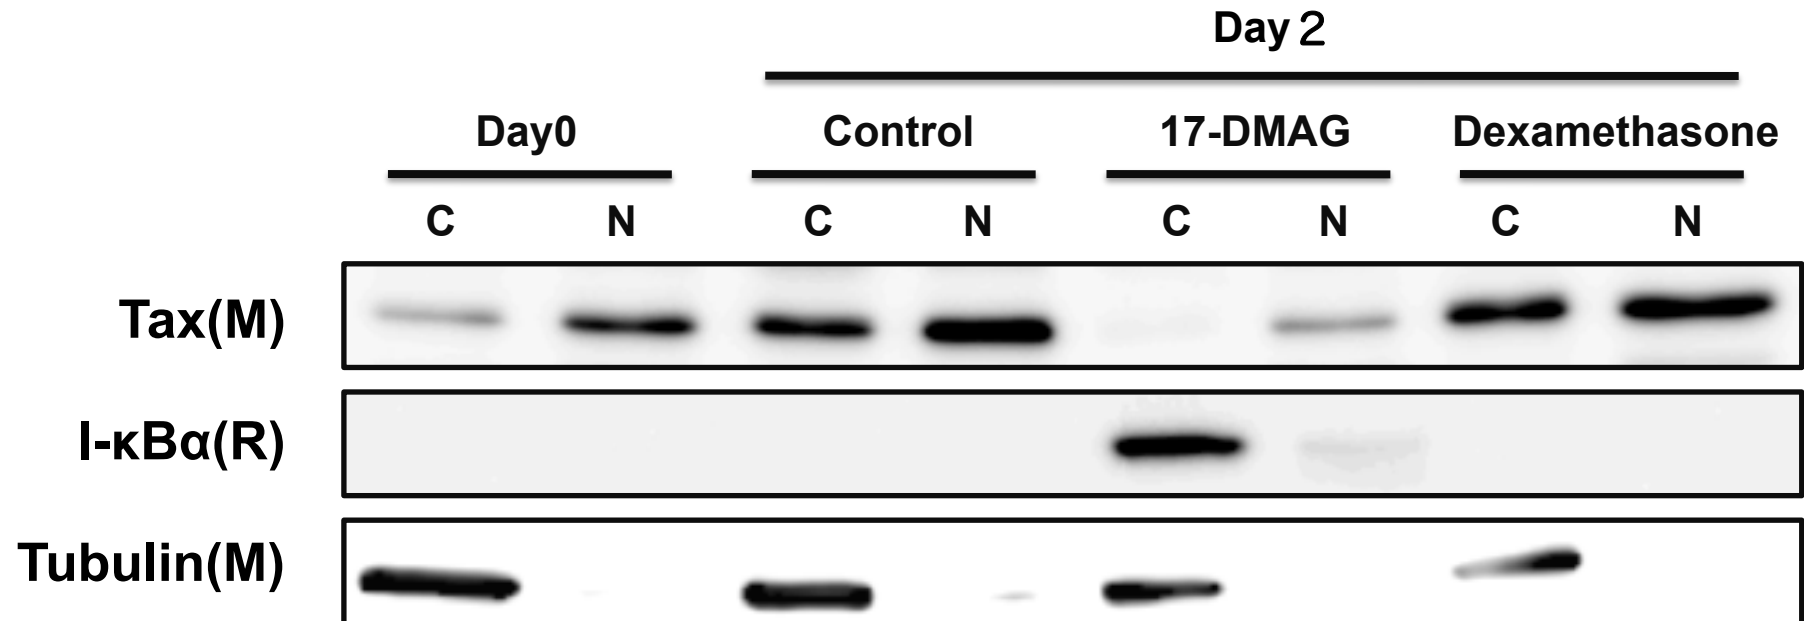

Cell : C8166

Chemical : 17-DMAG 2.5  $\mu$ M, Dexamethason 2.5  $\mu$ M

Cell lysate : nuclear fraction (N) 10  $\mu$ g/lane

cytoplasmic fraction (C) 20  $\mu$ g/lane
