# Supplementary material for: Oral administration of an HSP90 inhibitor, 17-DMAG, intervenes tumor-cell infiltration into multiple organs and improves survival period for ATL model mice
Source: PubMed Central journal article supplement — Blood Cancer J. 2013 Aug 16;3(8):e132–. doi: 10.1038/bcj.2013.30 (PMC3763384; doi:10.1038/bcj.2013.30), 2013-08-16
Supplement: bcj201330x2.pdf [file bcj201330x2.pdf]

## Supplement 2. IC50 of 17-DMAG against ATL cells and PBLs.

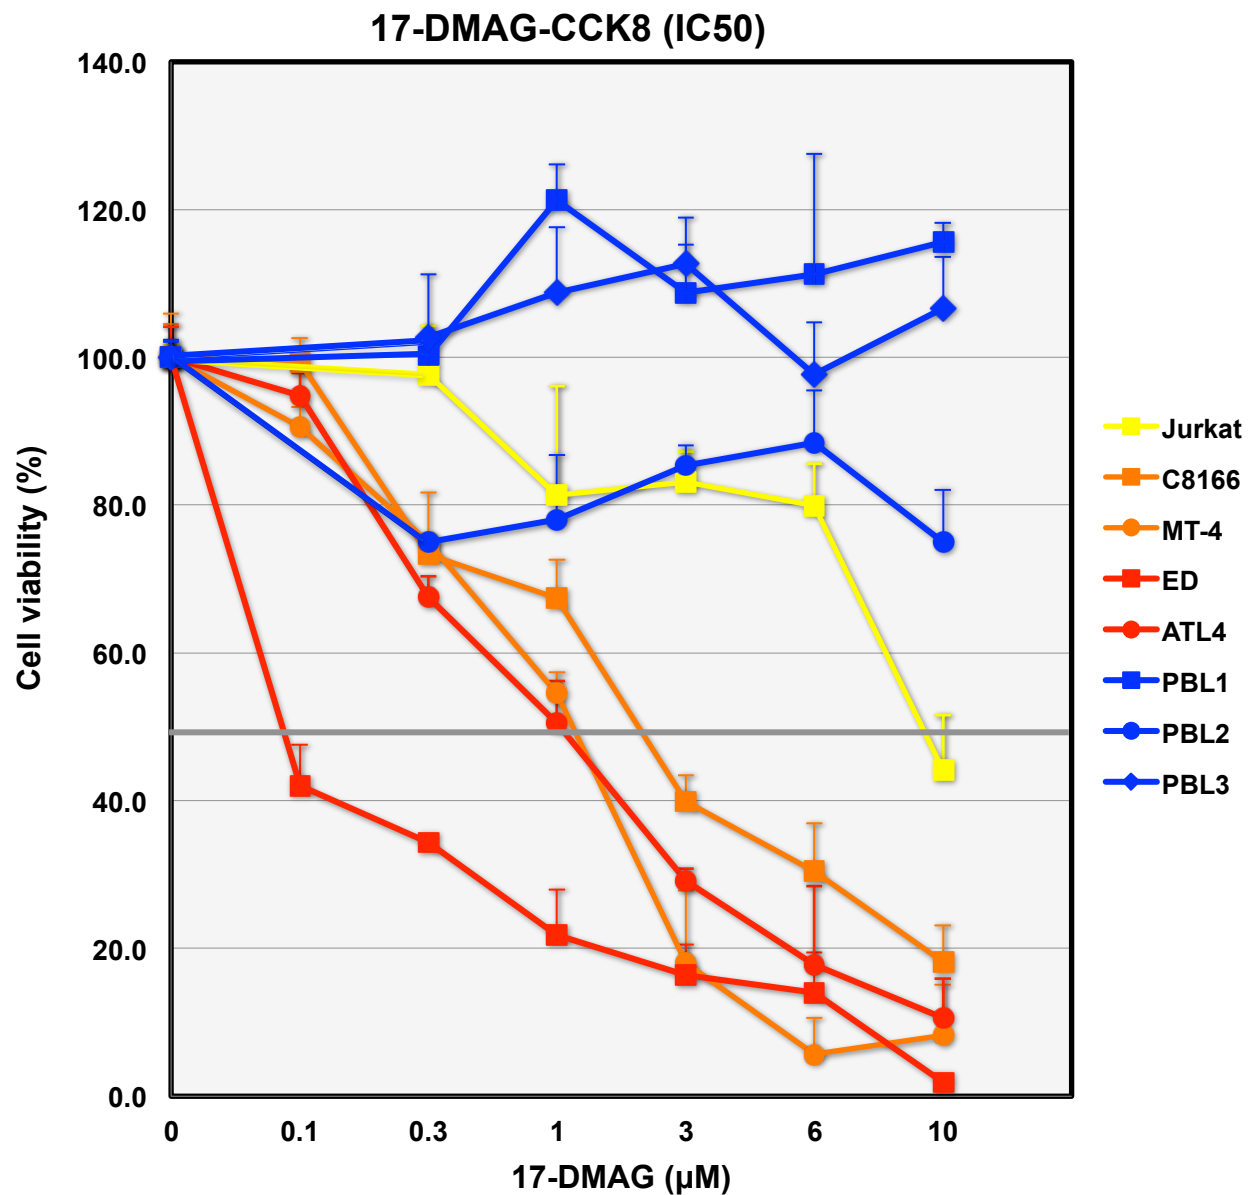

|        | IC50 ( $\mu\text{M}$ of 17-DMAG) |  |
|--------|----------------------------------|--|
| Jurkat | 9.32                             |  |
| C8166  | 2.33                             |  |
| MT-4   | 1.33                             |  |
| ED     | 0.06                             |  |
| ATL4   | 1.08                             |  |
| PBL1   | ND                               |  |
| PBL2   | ND                               |  |
| PBL3   | ND                               |  |
|        | ND: Not determined               |  |
