# Supplementary material for: Oral administration of an HSP90 inhibitor, 17-DMAG, intervenes tumor-cell infiltration into multiple organs and improves survival period for ATL model mice
Source: PubMed Central journal article supplement — Blood Cancer J. 2013 Aug 16;3(8):e132–. doi: 10.1038/bcj.2013.30 (PMC3763384; doi:10.1038/bcj.2013.30), 2013-08-16
Supplement: bcj201330x3.pdf [file bcj201330x3.pdf]

# Supplement 3. Schematic representation of Hsp90/Cdc37/Tax ternary complex.

(A)

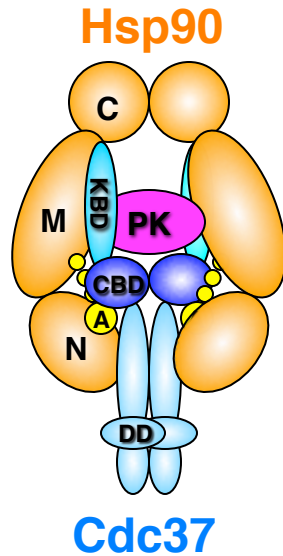

Hsp90/Cdc37-Kinase complex

(B)

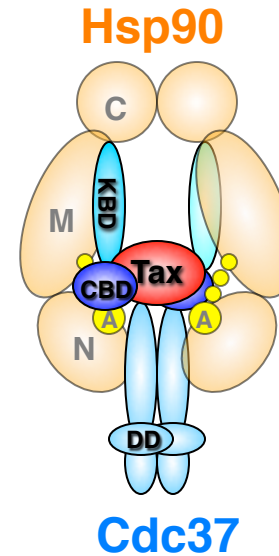

Hsp90/Cdc37-Tax complex

N: ATP binding domain  
1-213aa  
M: Middle domain  
214-432aa  
C: Dimerization domain  
433-732aa

KBD: Kinase binding domain  
40-110aa  
CBD: Client binding domain  
181-200aa  
DD: Dimerization domain  
220-250aa
