# Supplementary material for: Oral administration of an HSP90 inhibitor, 17-DMAG, intervenes tumor-cell infiltration into multiple organs and improves survival period for ATL model mice
Source: PubMed Central journal article supplement — Blood Cancer J. 2013 Aug 16;3(8):e132–. doi: 10.1038/bcj.2013.30 (PMC3763384; doi:10.1038/bcj.2013.30), 2013-08-16
Supplement: bcj201330x4.pdf [file bcj201330x4.pdf]

# Supplement 4. Experimental scheme of 17-DMAG oral treatment for HTLV-1 infected mice

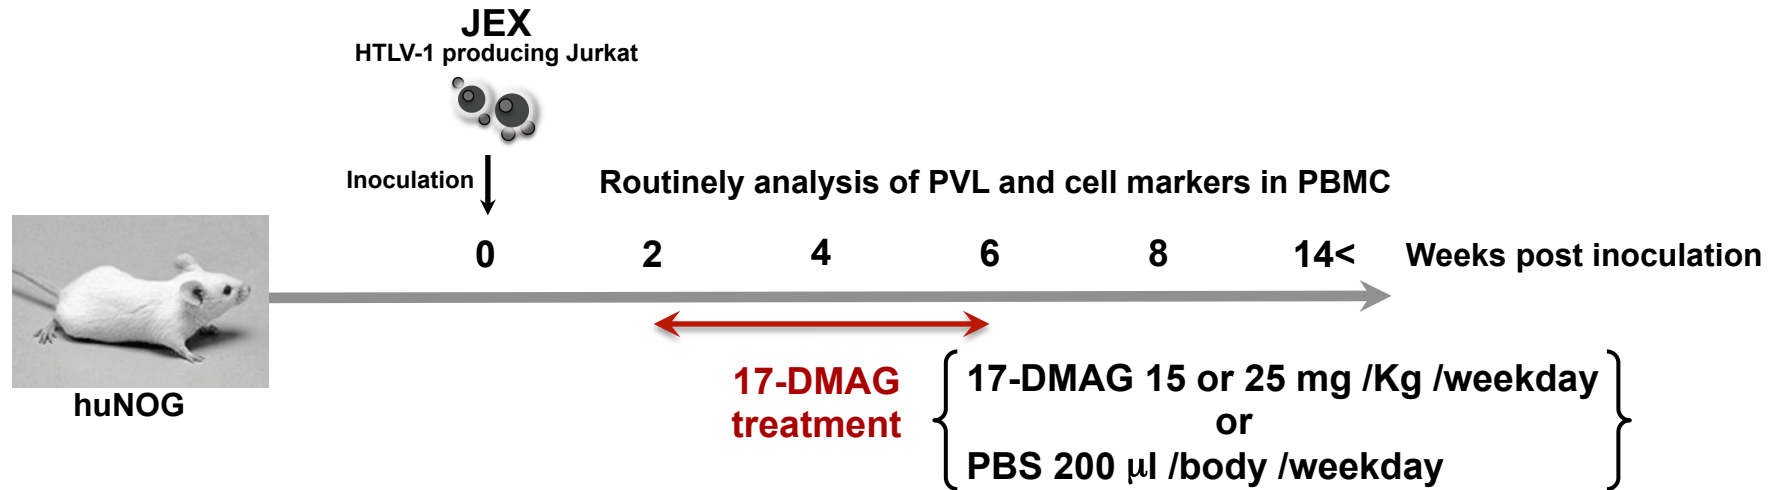

## Experiment #1

| mice | JEX          | Treatment            | Status        |
|------|--------------|----------------------|---------------|
| YZ15 | 1000000 i.p. | PBS p.o.             | Died 7 wpi    |
| YZ18 | 1000000 i.p. | PBS p.o.             | Died 7 wpi    |
| YZ20 | 1000000 i.p. | PBS p.o.             | Died 6 wpi    |
| YZ12 | 1000000 i.p. | 25mg/Kg 17-DMAG p.o. | (alive, S35*) |
| YZ13 | 1000000 i.p. | 25mg/Kg 17-DMAG p.o. | (alive, S20*) |
| YZ14 | 1000000 i.p. | 25mg/Kg 17-DMAG p.o. | Died 4 wpi    |
| YZ17 | 1000000 i.p. | 25mg/Kg 17-DMAG p.o. | Died 4 wpi    |

## Experiment #2

| mice | JEX          | Treatment            | Status        |
|------|--------------|----------------------|---------------|
| Z611 | 1000000 i.p. | PBS p.o.             | Died 12 wpi   |
| Z612 | 1000000 i.p. | PBS p.o.             | Died 10 wpi   |
| Z616 | 1000000 i.p. | PBS p.o.             | Died 8 wpi    |
| Z617 | 1000000 i.p. | 15mg/Kg 17-DMAG p.o. | (alive, S24*) |
| Z618 | 1000000 i.p. | 15mg/Kg 17-DMAG p.o. | Died 8 wpi    |
| Z619 | 1000000 i.p. | 15mg/Kg 17-DMAG p.o. | (alive, S22*) |
| Z620 | 1000000 i.p. | 15mg/Kg 17-DMAG p.o. | Died 6 wpi    |
