# Supplementary material for: Oral administration of an HSP90 inhibitor, 17-DMAG, intervenes tumor-cell infiltration into multiple organs and improves survival period for ATL model mice
Source: PubMed Central journal article supplement — Blood Cancer J. 2013 Aug 16;3(8):e132–. doi: 10.1038/bcj.2013.30 (PMC3763384; doi:10.1038/bcj.2013.30), 2013-08-16

# Supplement 5. siRNA against Cdc37 or Hsp90 do not influence on Tax expression

**A**

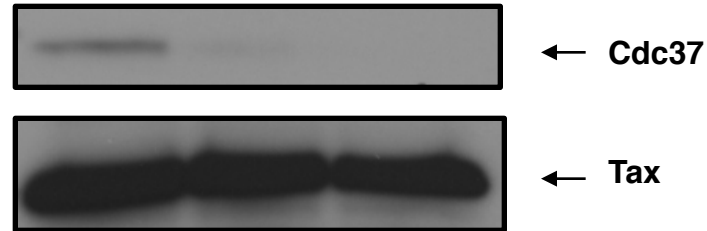

| siRNA      | Luciferase                     | Cdc37-1                       | Cdc37-1                        |
|------------|--------------------------------|-------------------------------|--------------------------------|
| Conditions | 1500 V<br>10 msec<br>10 pulses | 1700 V<br>10 msec<br>6 pulses | 1500 V<br>10 msec<br>10 pulses |

**B**

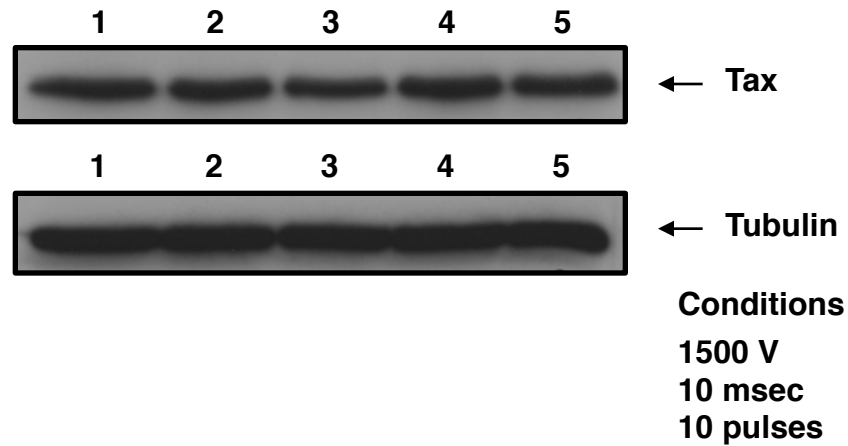

Supplement: bcj201330x5.pdf [file bcj201330x5.pdf]
