# Supplementary material for: Oral administration of an HSP90 inhibitor, 17-DMAG, intervenes tumor-cell infiltration into multiple organs and improves survival period for ATL model mice
Source: PubMed Central journal article supplement — Blood Cancer J. 2013 Aug 16;3(8):e132–. doi: 10.1038/bcj.2013.30 (PMC3763384; doi:10.1038/bcj.2013.30), 2013-08-16

# Supplement 6. Comparison of anti-ATL cell effects by the combined dosage of 17-DMAG/Nutlin-3a and 17-DMAG/LSG15

## A: 17-DMAG + Nutlin-3a

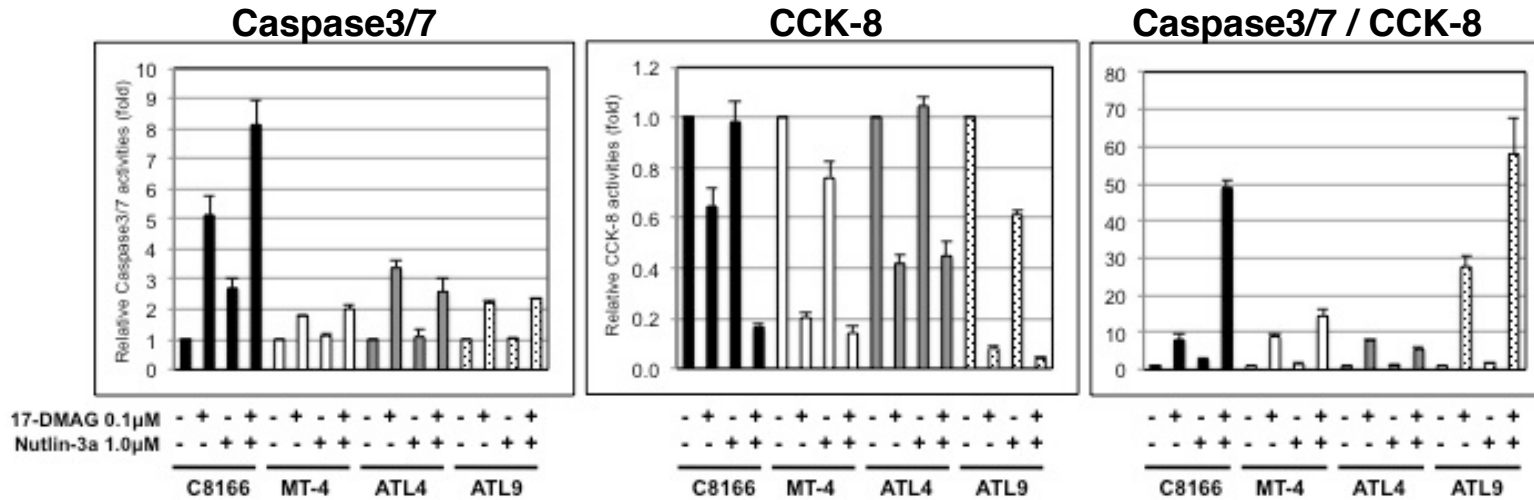

## B: 17-DMAG + LSG15 minus pledonisolone

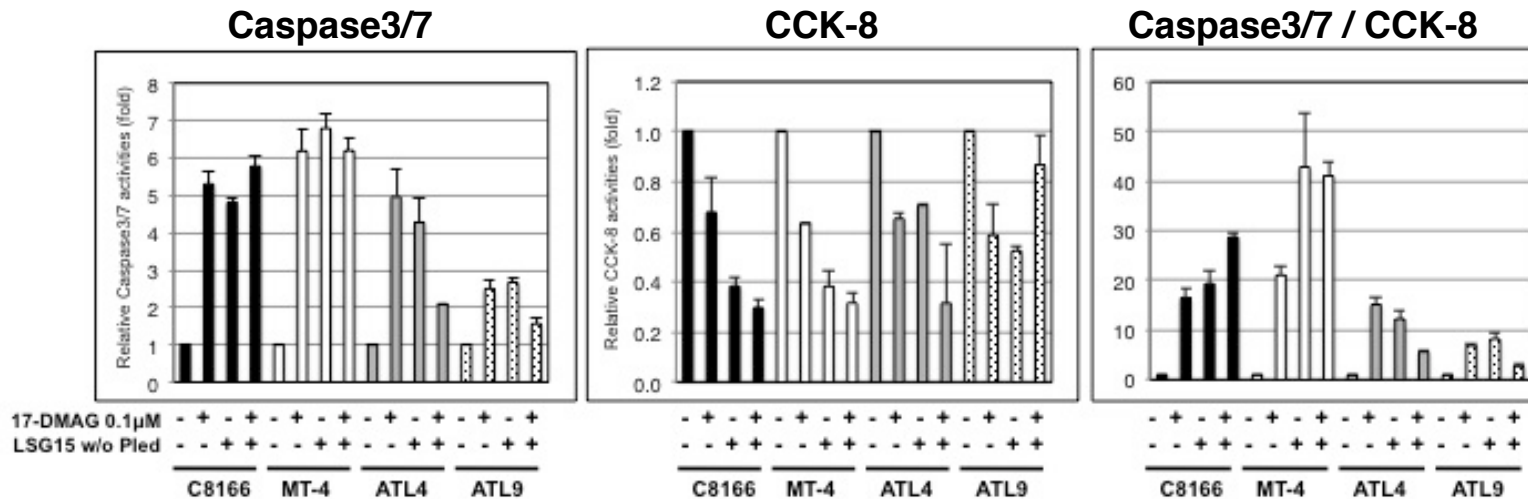

Supplement: bcj201330x6.pdf [file bcj201330x6.pdf]
